# Supplementary material
Source: Research Square preprint supplement (doi:10.21203/rs.3.rs-9717870/v1)
Supplement: Supplementary file 1 [file 3edb5753c10fb89b025aeef2.docx]

**Supplementary material**


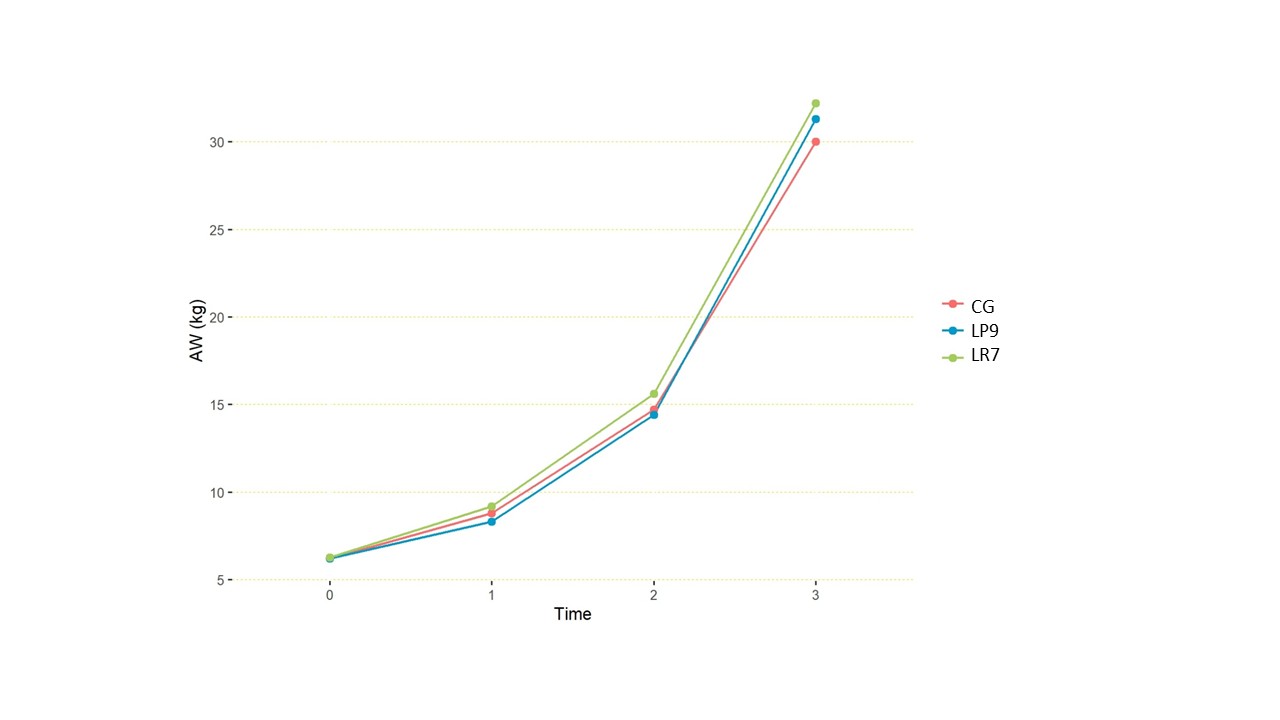


Supplementary Figure 1: Growth curve of mean body weight for the three treatment groups (kg). P0 corresponds to body weight at trial initiation; P1, P2, and P3 correspond to body weight measured at days 10, 24, and 48 of the trial, respectively. GC: Control; LP9: *L. plantarum* RC009; LR7: *L. rhamnosus* RC007.

Supplementary Table 1. Blood biochemistry

| **Blood biochemistry** | | **Control** | ***L. plantarum* RC009** | ***L. rhamnosus*  RC007** |
| --- | --- | --- | --- | --- |
|  | | X̅±DE | | |
| **Cholesterol 1 (mg/dl)** | | 67,13 ±14 | 75,05±8, 15 | 62,69±11,52 |
| **Cholesterol 2 (mg/dl)** | | 78,81±10,65 | 50,38±13,64* | 81,06±10,01 |
| **ALT 1 (UI/l)** | | 56,13±8,37 | 46,38±9,02* | 59, 31±16,59 |
| **ALT 2 (UI/l)** | | 48,13±8,11 | 33,13±8,57* | 50,00±9,28 |
| **Serum proteins 1** | **PT g %** | 4,68±0,18 | 5,7±0,35* | 4,97±0,28* |
| **ALB g /100 Ml** | 2,02±0,14 | 2,72±0,18* | 2,26±0,24* |
| **GLOB g /100 Ml** | 2,67±0,18 | 2,98±0,29* | 2,72±0,14 |
| **A/G** | 0,76±0,08 | 0,92±0,11* | 0,83±0,1* |
| **Serum proteins 2** | **PT g %** | 5,73±0,22 | 3,56±0,85* | 5,43±0,29* |
| **ALB g /100 Ml** | 2,74±0,25 | 1,59±0,36* | 2,74±0,25 |
| **GLOB g /100 Ml** | 2,9±0,28 | 1,98±0,52* | 2,72±0,23* |
| **A/G** | 0,93±0,14 | 0,82±0,1* | 1±0,14 |
| **Protein electrophoresis 1**  **(g/100 mL)** | **α1-globulin** | 1,01±0,1 | 1,02±0,09 | 0,09±0,03* |
| **α2-globulin** | 0,67±0,41 | 0,43±0,1* | 0,96±0,07* |
| **β-globulin** | 0,65±0,24 | 0,89±12* | 1,13±0,33* |
| **γ- globulin** | 0,34±0,22 | 0,64±0,12* | 0,54±0,33 |
| **Protein electrophoresis 2**  **(g/100 mL)** | **α1-globulin** | 0,1±0,02 | 0,48±0,34* | 0,08±0,02 |
| **α2-globulin** | 0,94±0,25 | 0,5±0,37* | 0,95±0,13 |
| **β-globulin** | 0,95±0,43 | 0,65±0,22* | 0,62±0,35* |
| **γ- globulin** | 0,89±0,5 | 0,34±0,11* | 1,08±0,45 |
| **Malondialdehyde** | **MDA 1 (nM/mL)** | 1,86 ± 0,39 | 1,52 ± 0,38* | 1,57 ± 0,37* |
| **MDA 2 (nM/mL)** | 1,75 ± 0,52 | 1,55 ± 0,36 | 1,63 ± 0,42 |

An asterisk (*) indicates results that differ significantly from the Control group according to Fisher’s LSD test (p < 0.05). Tables should be read horizontally.1: 24 days of the experimental period; 2: 48 days of the experimental period; SD: standard deviation; X̅: mean.


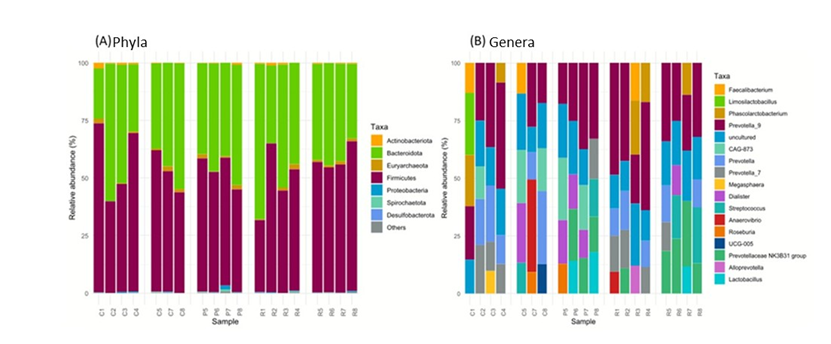


Supplementary Figure 2. (A) Relative abundance of phyla across all samples. (B) Relative abundance of the top five most abundant genera in each sample. C1–4 and R1–4: individuals from the Control and L. rhamnosus groups at 20 days of the experimental period. C5, 7, and 8; P5–8; and R5–8: individuals from the Control, *L. plantarum*, *and L. rhamnosus* groups at 48 days of the experimental period.

Supplementary Table 2

NCBI accessions for 16S rRNA gene V3–V4 amplicon sequencing data deposited in the Sequence Read Archive (SRA) under BioProject **PRJNA1469238**. Each sample represents a pool of faeces from two post-weaning pigs from the same pen. Treatment groups: **CG**, control diet; **LP9**, diet supplemented with *Lactiplantibacillus plantarum* RC009 (1×1012 CFU/kg feed); **LR7**, diet supplemented with *Lacticaseibacillus rhamnosus* RC007 (1×1012 CFU/kg feed).

| **Sample ID** | **Treatment group** | **Trial day** | **BioSample accession** |
| --- | --- | --- | --- |
| C1 | Control (CG) | 20 | SAMN60350156 |
| C2 | Control (CG) | 20 | SAMN60350157 |
| C3 | Control (CG) | 20 | SAMN60350158 |
| C4 | Control (CG) | 20 | SAMN60350159 |
| C5 | Control (CG) | 48 | SAMN60350160 |
| C7 | Control (CG) | 48 | SAMN60350161 |
| C8 | Control (CG) | 48 | SAMN60350162 |
| P5 | LP9 (*L. plantarum* RC009) | 48 | SAMN60350163 |
| P6 | LP9 (*L. plantarum* RC009) | 48 | SAMN60350164 |
| P7 | LP9 (*L. plantarum* RC009) | 48 | SAMN60350165 |
| P8 | LP9 (*L. plantarum* RC009) | 48 | SAMN60350166 |
| R1 | LR7 (*L. rhamnosus* RC007) | 20 | SAMN60350167 |
| R2 | LR7 (*L. rhamnosus* RC007) | 20 | SAMN60350168 |
| R3 | LR7 (*L. rhamnosus* RC007) | 20 | SAMN60350169 |
| R4 | LR7 (*L. rhamnosus* RC007) | 20 | SAMN60350170 |
| R5 | LR7 (*L. rhamnosus* RC007) | 48 | SAMN60350171 |
| R6 | LR7 (*L. rhamnosus* RC007) | 48 | SAMN60350172 |
| R7 | LR7 (*L. rhamnosus* RC007) | 48 | SAMN60350173 |
| R8 | LR7 (*L. rhamnosus* RC007) | 48 | SAMN60350174 |

*Sequencing data are held under embargo until publication and will become publicly available upon manuscript acceptance. BioProject URL: https://www.ncbi.nlm.nih.gov/bioproject/PRJNA1469238*
